# Supplementary material for: Dynamics of microbial communities during decomposition of litter from pioneering plants in initial soil ecosystems
Source: Copernicus journal article supplement (doi:10.5194/bg-10-5115-2013), 2013-07-26

Table S1: Selected meteorological data from the research site at individual harvesting time points of the experiment 2009.

|                              | <b>Harvesting time points 2009</b>  |                                  |                                   |                                   |                                       |                                         |
|------------------------------|-------------------------------------|----------------------------------|-----------------------------------|-----------------------------------|---------------------------------------|-----------------------------------------|
|                              | <i>April-29th</i><br><b>0 weeks</b> | <i>May-06th</i><br><b>1 week</b> | <i>May-13th</i><br><b>2 weeks</b> | <i>May-26th</i><br><b>4 weeks</b> | <i>August-12th</i><br><b>15 weeks</b> | <i>November-30th</i><br><b>30 weeks</b> |
| Soil moisture 0-5 cm [Vol %] | 10.05                               | 9.64                             | 9.75                              | 12.81                             | 20.92                                 | 5.83                                    |
| Soil temp. 0-5 cm [°C]       | 16.61                               | 12.24                            | 16.81                             | 22.05                             | 20.15                                 | 8.71                                    |
| Air temp. [°C]               | 13.91                               | 11.21                            | 11.39                             | 20.47                             | 18.24                                 | 6.83                                    |
| Relative humidity [%]        | 64.05                               | 86.36                            | 55.89                             | 69.79                             | 88.70                                 | 82.36                                   |

Figure S1: Precipitation amount at the research site in the year 2009 throughout the experimental period of 30 weeks.

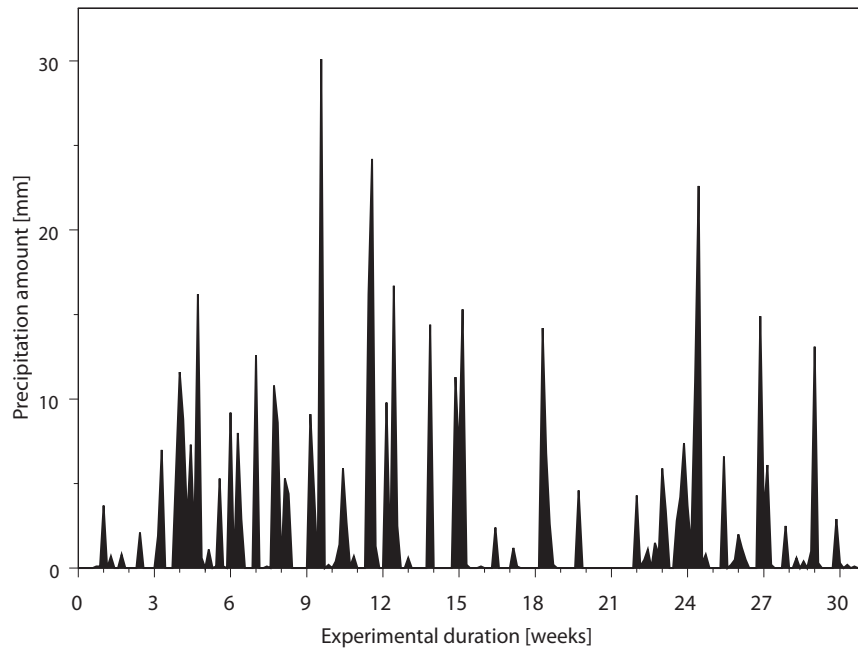

Supplement: Supplementary file 1 [file bg-10-5115-2013-supplement.pdf]
